# Supplementary material
Source: publisher figshare collection journal article supplement (https://sage.figshare.com/ndownloader/files/14984288)
Supplement: Supplementary file 1 [file 14984288]

# EphrinB2/EphB4 Signaling Regulates DPSCs to Induce Sprouting Angiogenesis of ECs

T. Gong, J. Xu, B. Heng, S. Qiu, B. Yi, Y. Han , E.C.M. Lo, and C. Zhang

## Appendix

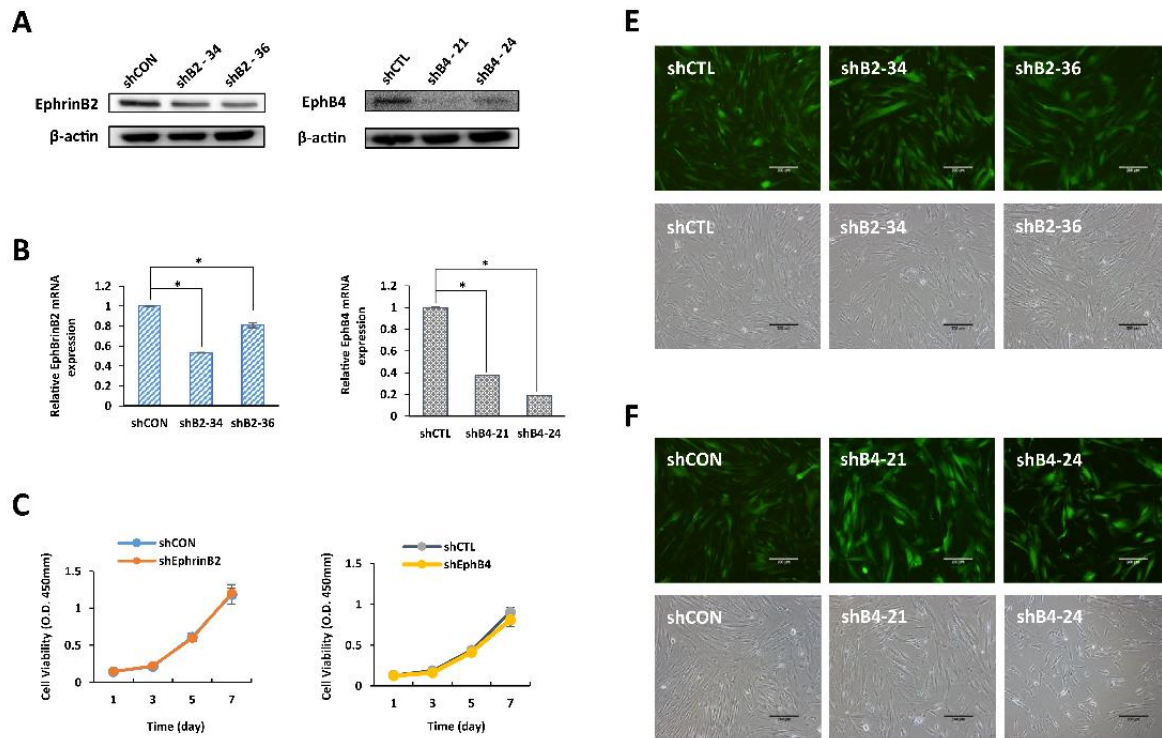

**Appendix Figure 1. Knock down of EphrinB2 and EphB4 expressions in DPSCs.** DPSCs were transduced with the lentiviral small hairpin RNA (shRNA) specific for EphrinB2 and EphB4 genes. Among the four shRNAs targeting EphrinB2, shB2-34 and shB2-36 were adopted in subsequent experiments; among four shRNAs targeting EphB4, shB4-21 and shB4-24 were adopted in subsequent experiments. **(A)** Western blots and **(B)** qRT-PCR analyses of EphrinB2 and EphB4 expression levels in DPSCs. Data were presented as mean  $\pm$  SD,  $*p < 0.05$ . **(C)** Cell counting kits 8 (CCK-8) assay of DPSCs after shRNA interferences targeting at EphrinB2 and EphB4. Data were presented as mean  $\pm$  SD,  $*p < 0.05$ . **(E, F)** Representative immunofluorescent and bright field images from DPSCs after shRNA interferences targeting at EphrinB2 and EphB4.
